# Supplementary material for: Incomplete influenza A virus genomes occur frequently but are readily complemented during localized viral spread
Source: PubMed Central journal article supplement (PMC6684657; doi:10.1038/s41467-019-11428-x), 2019-08-06
Supplement: 41467_2019_11428_MOESM1_ESM.pdf [file 41467_2019_11428_MOESM1_ESM.pdf]

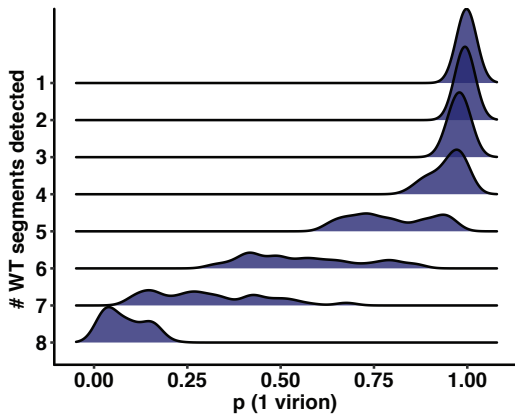

**Supplementary Figure 1 — Cells containing more segments are more likely to be multiply infected.**

Bayes' rule was used to calculate the probability that each cell was infected with exactly 1 virion, based on the number of infected cells in each experiment, and each cell's combination of segment presences and absences. The distribution of probabilities is shown stratified by the number of segments present per cell.

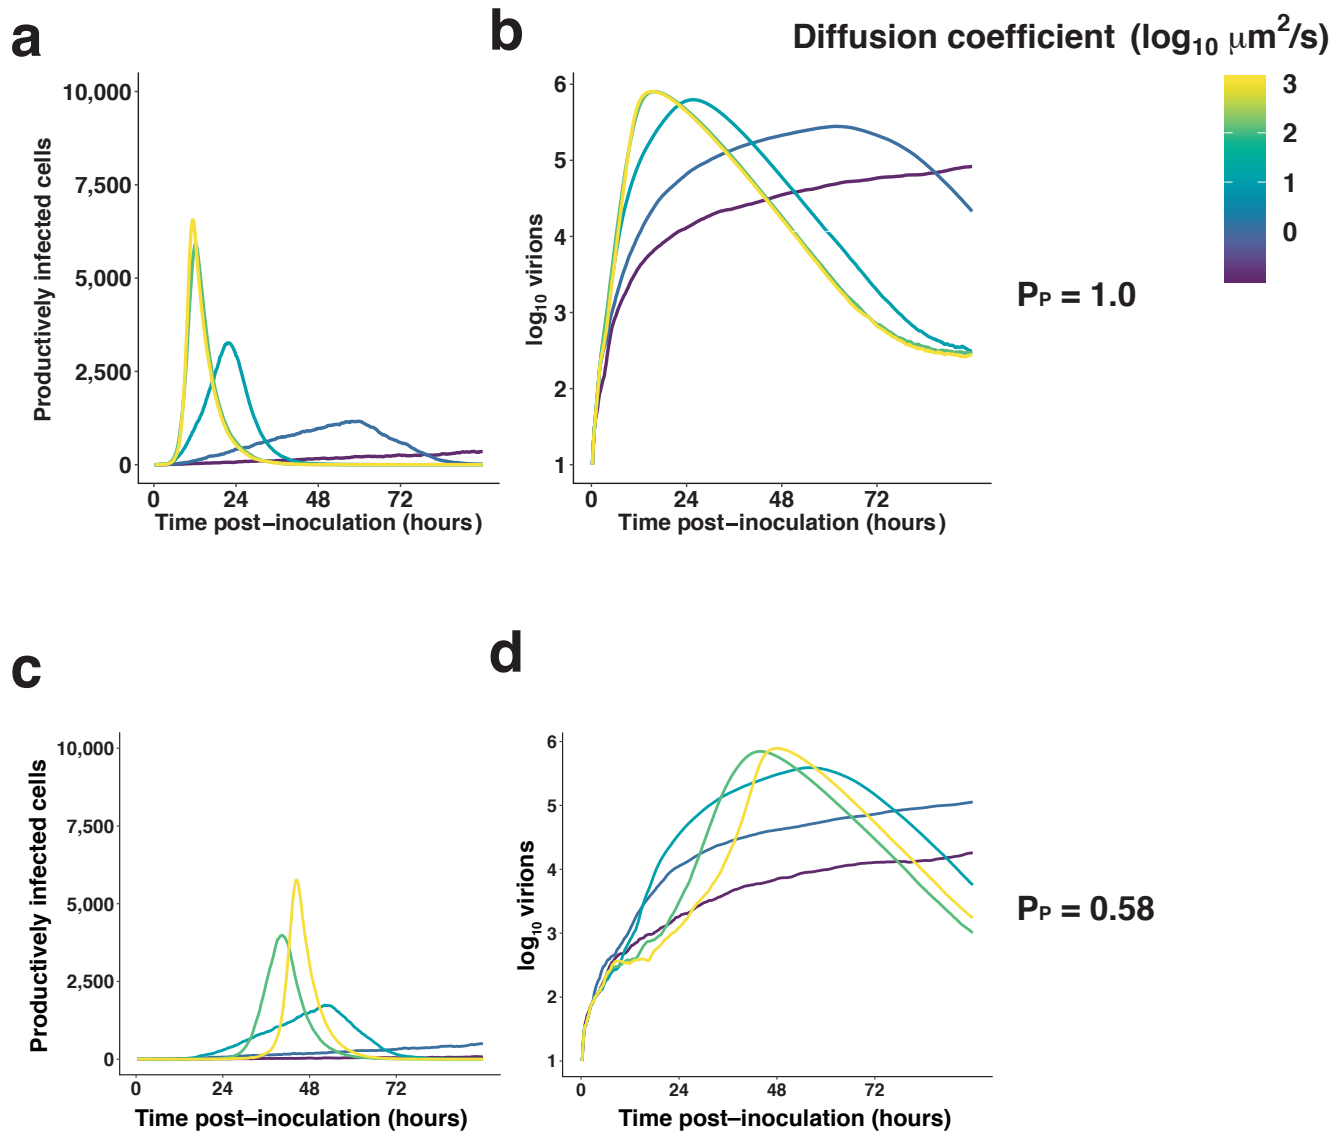

**Supplementary Figure 2 — Infection dynamics are influenced by diffusion coefficient and the presence of incomplete viral genomes.**

(A, B) The dynamics of infection, in terms of productively infected cells (A) or virions present (B) are shown for a virus with complete genomes ( $P_P = 1.0$ ).

(C, D) The dynamics of infection, in terms of productively infected cells (C) or virions present (D) are shown for a virus with incomplete genomes ( $P_P = 0.58$ ).

Lines are colored by diffusion coefficient.

**a**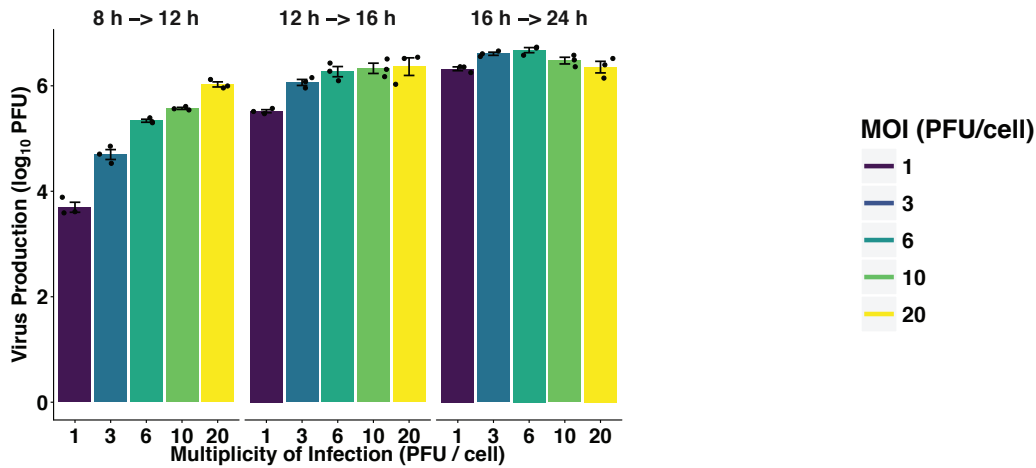**b**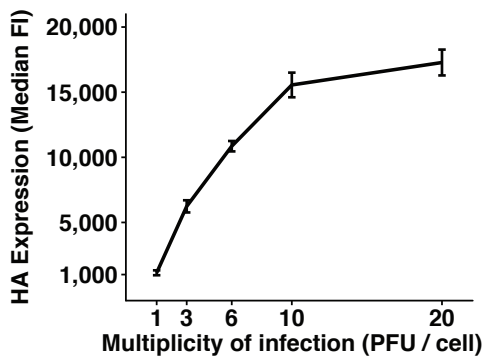**c**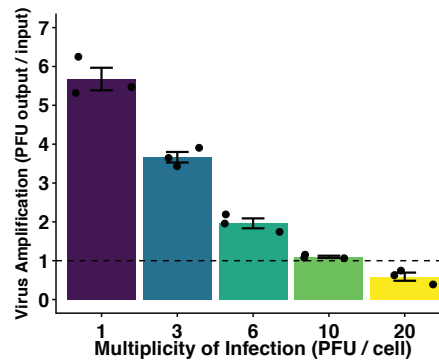

**Supplementary Figure 3 — Multiple infection provides a kinetic benefit to viral replication and enhances gene expression, at the cost of reduced viral amplification.**

(A) The amount of virus produced (in PFU) in three distinct time periods was calculated at each MOI.

(B) The amount of HA expression (median fluorescence intensity) among HA<sup>+</sup> cells is shown across a range of MOIs at 12 hours post-inoculation.

(C) Amplification of virus was calculated by dividing the amount of virus produced (in PFU) after 48 hours by the number of PFU used to inoculate cells.

Error bars represent mean ± S.E.

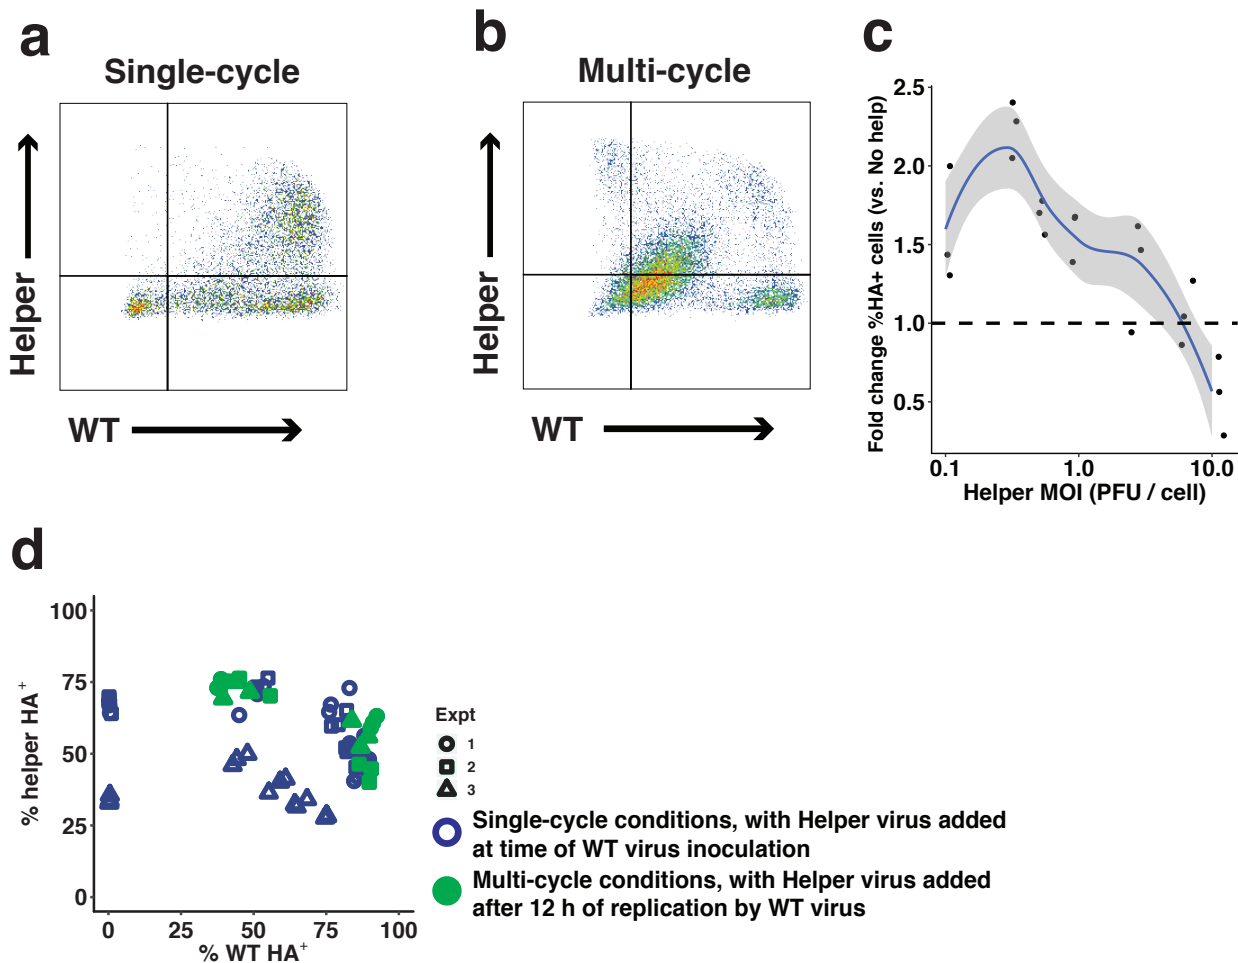

**Supplementary Figure 4 — Intermediate levels of Pan/99-Helper virus enable detection of incomplete WT viral genomes, without being hindered by super-infection exclusion.**

(A,B) Representative flow cytometry measurement of Pan/99-WT HA when Pan/99-Helper virus is added simultaneously (A), or following 12 h of multi-cycle replication (B). Pan/99-WT MOI = 0.1 PFU/cell for simultaneous co-infection, 0.01 PFU/cell for multi-cycle replication. Pan/99-Helper virus MOI was 0.3 PFU/cell in both cases.

(C) Cells were inoculated with Pan/99-WT (MOI = 0.01 PFU/cell) and Pan/99-Helper at a range of MOI, then incubated under single-cycle conditions before staining for expression of WT and Helper HA proteins. The extent to which Pan/99-Helper increased numbers of WT HA<sup>+</sup> cells (relative to controls infected with only Pan/99-WT) was calculated at each Pan/99-Helper MOI. Curve and ribbon represent mean and 95% confidence interval (mean  $\pm$  1.96 \* S.E.), respectively, of local regression.

(D) Pan/99-Helper virus HA expression was plotted against Pan/99-WT virus HA expression to determine whether multi-cycle replication of WT virus resulted in super-infection exclusion of Helper virus, thereby limiting the ability of Helper virus to complement IVGs after multi-cycle replication. For single-cycle conditions, cells were simultaneously inoculated with Pan/99-WT virus and Pan/99-Helper, then incubated under single-cycle conditions for 12 h (blue open circles). For multi-cycle conditions, cells were inoculated with Pan/99-WT virus at low MOI and incubated under multi-cycle conditions for 12 h, then inoculated with Pan/99-Helper virus and incubated under single-cycle conditions for 12 h (green open circles).

**a**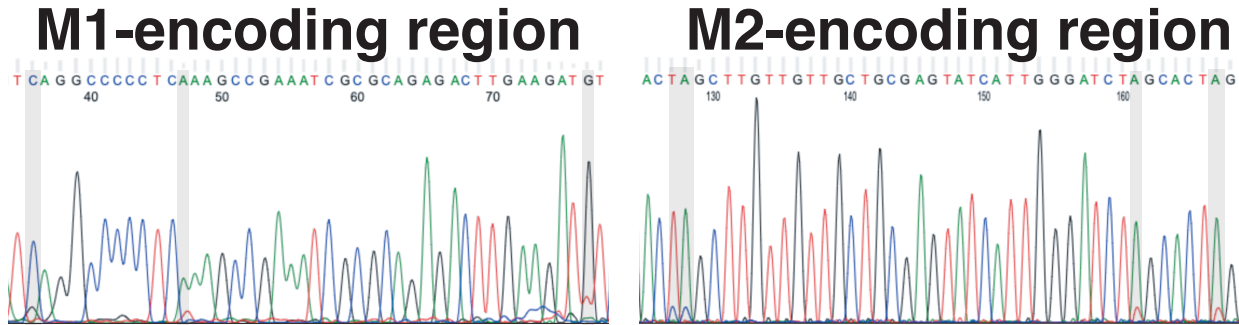**b**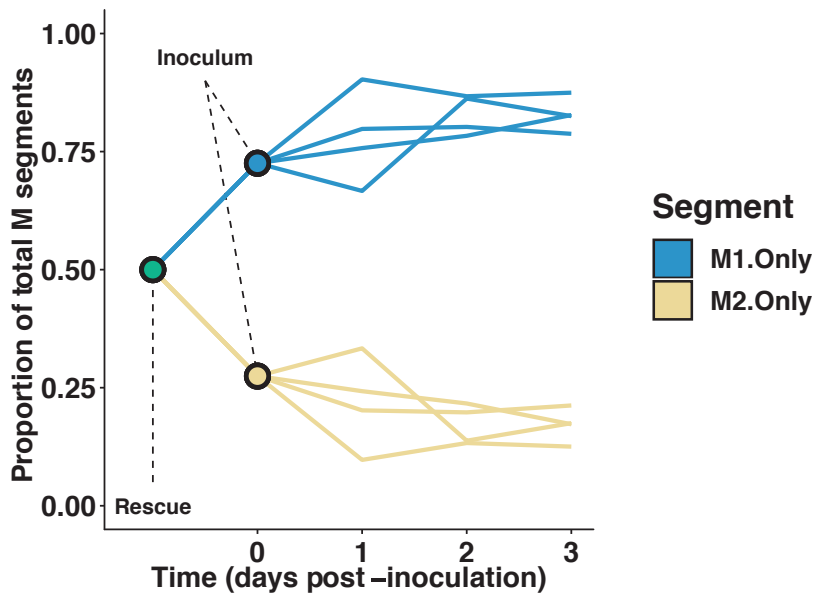

**Supplementary Figure 5 — Both M1.Only and M2.Only genome segments are maintained in vivo following infection with Pan/99-M.STOP virus.**

(A) M segments of virus recovered from guinea pigs at 2 d post-inoculation with Pan/99-M.STOP virus were amplified by PCR, and the M1-encoding (left) and M2-encoding (right) regions were sequenced to verify maintenance of both alleles in vivo. Shaded gray rectangles highlight mutated regions.

(B) Guinea pigs were inoculated with Pan/99-M.STOP virus, and ddPCR was used to quantify copy numbers of M1.Only (blue) and M2.Only (yellow) segments, expressed as a proportion of all M segments. Blue and yellow dots represent the frequencies of M1.Only and M2.Only segments present in the virus stocks used to prepare inocula. The green dot represents the plasmid mixture used to generate the virus, in which equal molar quantities of M1.Only and M2.Only pDP plasmids were combined.

**Supplementary Table 1 — Genotype of Pan/99-Helper virus**

| <b>Segment</b> | <b>Mutations relative to Pan/99-WT</b>                    |
|----------------|-----------------------------------------------------------|
| PB2            | A550C, G552A, A555C, C556T,<br>A617C, T621C, T622A, C623G |
| PB1            | C346T, T348G, A351G,<br>T441A, T444A, A447T               |
| PA             | G603A, T604A, C605G,<br>C747T, T750C, G753A               |
| HA             | T308C, C311A, C313T,<br>A464T, C467G, T470A               |
| NP             | C537T, T538A, C539G,<br>G606C, A609T, G615C               |
| NA             | C418G, T421A, A424C,<br>T511A, T514A, A517G               |
| M              | C413T, C415G, A418C,<br>A517G, G523A, A526C               |
| NS             | A210C, G212A, G215A, T218C,<br>C329T, C335T, A341G        |

**Supplementary Table 2 — Primers for single-cell assay**

| <b>Primer Name</b> | <b>Sequence (5' — 3')</b> | <b>Virus targeted</b>          |
|--------------------|---------------------------|--------------------------------|
| PB2 537F wt        | TGAAGTGGGAGCCAGGATAC      | Pan/99-WT                      |
| PB2 640R wt        | ATGCAACCATCAAGGGAGAA      | Pan/99-WT                      |
| PB1 332F wt        | TTGAGAGCTCATGCCTTGAA      | Pan/99-WT                      |
| PB1 459R wt        | GTTGGCTAATGCAGTTGCTG      | Pan/99-WT                      |
| PA 595F wt         | TTTCGTCAGTCCGAAAGAGG      | Pan/99-WT                      |
| PA 741R wt         | AGCTTGCCCTCAATGCAGCCG     | Pan/99-WT                      |
| HA 266F wt         | ACCCTCATTGTGATGGCTTC      | Pan/99-WT                      |
| HA 452R wt         | GTTCCATTCTGAGCGACTCC      | Pan/99-WT                      |
| NP 520F wt         | ATGGATCCCAGAATGTGCTC      | Pan/99-WT                      |
| NP 625R wt         | TCAGCTCCATCACCATTGTC      | Pan/99-WT                      |
| NA 408F wt         | ATCAATTTGCCCTTGGACAG      | Pan/99-WT                      |
| NA 528R wt         | CCCAAATGAAATGGAACACC      | Pan/99-WT                      |
| M 402F wt          | GTTGCATGGGCCTCATATAC      | Pan/99-WT                      |
| M 535R wt          | ATTGGTTGTTGCCACCATTG      | Pan/99-WT                      |
| NS 173F wt         | CCATGTTGGAAAGCAGATTG      | Pan/99-WT                      |
| NS 321R wt         | GGGCATTAGCATGAACCAGT      | Pan/99-WT                      |
| PB2 537F var       | TGAAGTGGGAGCCCGAATCT      | Pan/99-Helper                  |
| PB2 640R var       | ATGCAACCATCAACGGACTG      | Pan/99-Helper                  |
| PB1 332F var       | TTGAGAGCTCATGCTTGGAG      | Pan/99-Helper                  |
| PB1 459R var       | GTTGGCTAATGCTGTAGCAG      | Pan/99-Helper                  |
| UnivF(A) + 6       | GCGCGCAGCAAAGCAGG         | Pan/99-WT and<br>Pan/99-Helper |
| UnivF(G) + 6       | GCGCGCAGCGAAAGCAGG        | Pan/99-WT and<br>Pan/99-Helper |

**Supplementary Table 3 — Primers and probes for ddPCR**

| <b>Primer/Probe Name</b>        | <b>Sequence (5' — 3')</b>                |
|---------------------------------|------------------------------------------|
| M2 F ddPCR Primer               | ACTCATCCTAGCTCCAG                        |
| M2 R ddPCR Primer               | CCGTGTTTGAAGAGTCG                        |
| M2.Only ddPCR Probe (M2 WT)     | HEX – CCATTCGTTTCTGATAGGTCTG – BHQ1      |
| M1.Only ddPCR Probe (M2 Mutant) | 6-FAM – CCATACGCTTCTGGTACGTCTG – BHQ1    |
| M1 Sequencing Primer            | TAGATATTGAAAGATGAGCC                     |
| M2 Sequencing Primer            | TAGATATTGAAAGATGAGCC                     |
| NS F ddPCR Primer               | ACCTGCTTCGCGATACATAAC                    |
| NS R ddPCR Primer               | AGGGGTCCTTCCACTTTTTG                     |
| NS ddPCR Probe                  | 6-FAM – AGAAACTGGTTCATGCTAATGCCCA – BHQ1 |
